# Supplementary material for: Prevalence and impact of SARS-CoV-2 infection on maternal and infant health in African populations: protocol of a multicentre prospective cohort study (MA-CoV project)
Source: PubMed Central journal article supplement — BMJ Open. 2023 May 22;13(5):e067083. doi: 10.1136/bmjopen-2022-067083 (PMC10230341; doi:10.1136/bmjopen-2022-067083), 2023-05-22
Supplement: bmjopen-2022-067083supp001.pdf [file bmjopen-2022-067083supp001.pdf]

**Prevalence and impact of SARS-CoV-2 infection on maternal and infant health in African populations: protocol of a multi-centre prospective cohort study (MA-CoV project)**

Supplementary material

File 1: Informed Consent of study..... 2  
File 2: Study case report forms..... 5

## File 1: Informed Consent of study

**“Prevalence and impact of SARS-CoV-2 infection on maternal and infant health in African populations (MA-CoV)”****Introduction**

The burden of COVID-19 is still unknown since access to diagnostic tests has been limited and therefore reserved for patients with severe disease and/or high-risk groups. In the African region, the number of reported cases is spreading and it is likely that vulnerable populations such as pregnant women and their fetuses will be directly and/or indirectly affected in the context of fragile health systems. It is important to understand the possible effects of COVID-19 on the health of pregnant and infants living in these regions to develop specific prevention measures.

**Purpose and procedures of this study**

The information coming from this MA-CoV study will help to understand the effects of the pandemic virus in African pregnant women. If you agree to be in the MA-CoV study, you will have a test done at the **first antenatal care visit and in follow up visits** in case you have symptoms or signs suggestive of COVID-19.

**About the COVID-19 test**

The test is a procedure called nasopharyngeal (NP) swab. The NP swab involves placing a swab (like a very long Q-tip) in your nose to collect cells and secretions. The swab will go into your nasal cavity, above the roof of your mouth. In some cases, the swab may only go into the nostril. The swab will be sent to a laboratory for testing to see if you are infected with COVID-19. The results of the COVID-19 testing will be made available to you, together with sufficient information to understand what the results mean. In case you are found to be infected, you will receive treatment free of charge and information regarding isolation and transmission prevention measures to be put in place at your home.

**What happens during the study?**

If you agree to be in this study, your first visit will continue today, after you read, discuss, and sign or put thumbprint on this form. You will be asked to come back to the clinic monthly before delivery. In addition, you must agree to deliver your baby at the study facility rather than at home.

If you agree to be in this study:

- We will first ask you some questions about yourself and your health
- We will ask you to give information on where you live and how to keep in contact with you
- A study clinician will examine you and will check your pregnancy status
- You will also be asked to give a venous blood sample at the first visit for tests of your blood (malaria and COVID-19 virus antibodies)
- In case you will be unwell with malaria or other infection, you will have additional blood tests done and if needed you will be given medicine and asked to come back here as scheduled by study staff
- You and your baby will receive a unique identification number (ID) and identification study card, which you will be requested to present to the study staff at every visit
- At delivery you will be visited during in the labour ward and you and your new-born baby will be examined by the study personnel.
- In addition to venous blood being collected from you, also a sample of cord blood will be taken to analyse the presence of COVID-19 virus antibodies
- A piece of placenta will be examined at the study laboratory and also tested for COVID-19 virus
- You must agree to deliver at the health facility but in case you deliver at home, the study staff will visit you as soon as possible but not later than one week after delivery and will ask you questions about your delivery and about health of your infant. At this visit you and your infant will be examined by the study personnel. Blood sample will be taken from you for tests of malaria
- We will ask you to provide us with a small sample of breastmilk (3 ml, less than a teaspoon) within three days and one month after your infant's birth to investigate if the virus can be found in maternal milk.
- When your baby is born, your child will be followed up until he/she is 1 month old
- You will be asked to come back with your new-born to the study clinic around 1 month after delivery to exam your baby and see if your baby is growing well

**Other COVID-19 analyses and samples**

We will also analyse the presence of the virus (which is called SARS-CoV-2) in the blood and placental samples that will be collected from you at enrolment and at the end of pregnancy. In case you are found to be infected with the COVID-19 virus, your infant will also be tested with a NP swab at birth. Also, if she/he presents with symptoms or signs suggestive of COVID-19 during her/his first month of life, she/he will have a test done and will receive the indicated treatment.

**Alternatives to joining the MA-CoV study**

If you choose not to participate in this study you will receive standard ANC care as before.

**Risks or discomforts (mother and infant)**

You might feel slight discomfort when we take nasopharyngeal swabs or venous blood samples at enrolment and delivery. There will be no other risks.

**Benefits to you and your infant**

By participating in the study, you may get better diagnosis of COVID-19 and other diseases such as malaria because of increased number of tests done. You and your baby will be regularly seen by clinical staff and in case of any symptoms or abnormal test results you and your baby will be either treated here or referred to another clinic for medical care.

**STATEMENT of CONSENT AND SIGNATURE**

Participant approval:

The consent form has been explained to me and I agree to take part in the MA-CoV study. I understand that I am free to choose to be in this activity and that saying "No" will not affect the treatment I get in this clinic, now and in future.

NOTE: You are not giving up any of your legal rights by signing this informed consent document.

If you agree circle YES

|                             |                                                          |      |
|-----------------------------|----------------------------------------------------------|------|
| Volunteer's Name<br>(print) | Volunteer's Signature or<br>Thumbprint (if cannot write) | Date |
|-----------------------------|----------------------------------------------------------|------|

|                                                                                       |                            |      |
|---------------------------------------------------------------------------------------|----------------------------|------|
| Volunteer's Legal Guardian<br>or Representative<br>(as per country policy)<br>(print) | Legal Guardian's Signature | Date |
|---------------------------------------------------------------------------------------|----------------------------|------|

|                                                          |                     |      |
|----------------------------------------------------------|---------------------|------|
| Witness's Name<br>(if participant illiterate)<br>(print) | Witness's Signature | Date |
|----------------------------------------------------------|---------------------|------|

I have explained the purpose of this study to the volunteer. To the best of my knowledge, she understands the purpose, procedures, risks and benefits of this study.

|                                       |                                 |      |
|---------------------------------------|---------------------------------|------|
| Investigator/Designee Name<br>(print) | Investigator/Designee Signature | Date |
|---------------------------------------|---------------------------------|------|

NOTE: This consent form with original signatures must be retained on file by the principal investigator. A copy must be given to the volunteer. If the woman refuses to take her copy of the consent with her, she states so below and signs and dates her decline statement.

File 2: Study case report forms



## **BIRTH**

### ***Newborn visit***

|                                                          |                                                                         |  |
|----------------------------------------------------------|-------------------------------------------------------------------------|--|
| <b>Ma-COV</b><br><br><b>Event: Birth - Newborn visit</b> | <b>ID</b> MACOC _ - _ _ _ _ _ _ <br>Site Code Subject N <sup>o</sup>    |  |
|                                                          | <b>Participant's initials</b>  _ _   _ _ <br>1. 2. Family name          |  |
|                                                          | <b>Date of the visit</b><br> _ _ - _ _ - _ _ _ _ _ _ <br>Day Month Year |  |

| <b>INCLUSION CRITERIA CHECK</b>                          |                                                                                                                             |
|----------------------------------------------------------|-----------------------------------------------------------------------------------------------------------------------------|
| 1                                                        | Mother's ID MACOW _ - _ _ _ _ _ _ <br>Site Code Subject N <sup>o</sup>                                                      |
| 2                                                        | Date of birth  _ _ - _ _ - _ _ _ _ _ _ <br>Day Month Year                                                                   |
| 3                                                        | Sex Masculine <input type="checkbox"/> Feminine <input type="checkbox"/>                                                    |
| <b>MEDICAL HISTORY AND PHYSICAL EXAMINATION AT BIRTH</b> |                                                                                                                             |
| 4                                                        | Weight (g)  _ _ _ _ _ _                                                                                                     |
| 5                                                        | Length (cm)  _ _ . _                                                                                                        |
| 6                                                        | Head circumference (cm)  _ _ . _                                                                                            |
| 7                                                        | Axillary temperature (°C)  _ _ . _                                                                                          |
|                                                          | Congenital abnormalities? Yes <input type="checkbox"/> No <input type="checkbox"/>                                          |
|                                                          | 8.1. Face and head Normal <input type="checkbox"/><br>Abnormal <input type="checkbox"/><br>Unknown <input type="checkbox"/> |
|                                                          | 8.2. Limbs Normal <input type="checkbox"/><br>Abnormal <input type="checkbox"/><br>Unknown <input type="checkbox"/>         |
|                                                          | 8.3. Chest Normal <input type="checkbox"/><br>Abnormal <input type="checkbox"/><br>Unknown <input type="checkbox"/>         |
| 8                                                        | 8.4. Spine Normal <input type="checkbox"/><br>Abnormal <input type="checkbox"/><br>Unknown <input type="checkbox"/>         |
|                                                          | 8.5. Abdomen Normal <input type="checkbox"/><br>Abnormal <input type="checkbox"/><br>Unknown <input type="checkbox"/>       |
|                                                          | 8.6. Genitalia Normal <input type="checkbox"/><br>Abnormal <input type="checkbox"/><br>Unknown <input type="checkbox"/>     |
|                                                          | 8.7. Other abnormalities Yes <input type="checkbox"/> No <input type="checkbox"/>                                           |
|                                                          | 8.7.1. If yes, describe _____                                                                                               |
| <b>If necessary, fill in the comments section</b>        |                                                                                                                             |



|                                                                                                   |                                                                                                                         |                                   |                                   |
|---------------------------------------------------------------------------------------------------|-------------------------------------------------------------------------------------------------------------------------|-----------------------------------|-----------------------------------|
| 9                                                                                                 | Does the child need admission to the hospital for any problem?<br><i>If the answer is yes please fill in an AE form</i> | Yes <input type="checkbox"/>      | No <input type="checkbox"/>       |
| 10                                                                                                | 10.1. Neuromuscular maturity                                                                                            | 10.1.1 Posture score              | <input type="text"/>              |
|                                                                                                   |                                                                                                                         | 10.1.2 Square window              | <input type="text"/>              |
|                                                                                                   |                                                                                                                         | 10.1.3 Arm recoil                 | <input type="text"/>              |
|                                                                                                   |                                                                                                                         | 10.1.4 Popliteal angle            | <input type="text"/>              |
|                                                                                                   |                                                                                                                         | 10.1.5 Scarf sign                 | <input type="text"/>              |
|                                                                                                   |                                                                                                                         | 10.1.6 Heel to ear                | <input type="text"/>              |
|                                                                                                   | Ballard test:                                                                                                           |                                   |                                   |
|                                                                                                   | 10.2. Physical maturity                                                                                                 | 10.2.1 Skin                       | <input type="text"/>              |
|                                                                                                   |                                                                                                                         | 10.2.2 Lanugo                     | <input type="text"/>              |
|                                                                                                   |                                                                                                                         | 10.2.3 Plantar surfasse           | <input type="text"/>              |
|                                                                                                   | 10.2.4 Breast                                                                                                           | <input type="text"/>              |                                   |
|                                                                                                   | 10.2.5 Eye-Ear                                                                                                          | <input type="text"/>              |                                   |
|                                                                                                   | 10.2.6 Geniyals                                                                                                         | <input type="text"/>              |                                   |
| <b>THROAT SWAB</b>                                                                                |                                                                                                                         |                                   |                                   |
| <b>IF THE MOTHER'S PCR HAS BEEN POSITIVE AT PREGNANCY, PLEASE FILL IN THE FOLLOWING QUESTIONS</b> |                                                                                                                         |                                   |                                   |
| 11                                                                                                | Was a throab swab for COVID-19 collected from the newborn?                                                              | Yes <input type="checkbox"/>      | No <input type="checkbox"/>       |
| 12                                                                                                | IF yes, indicate the SARS-CoV-2 PCR result<br><i>If positive, fill/update the Adverse Event Form</i>                    | Positive <input type="checkbox"/> | Negative <input type="checkbox"/> |
| 13                                                                                                | Was a rapid antigen test for COVID-19 performed?                                                                        | Yes <input type="checkbox"/>      | No <input type="checkbox"/>       |
| 14                                                                                                | IF yes, indicate the COVID-19 rapid antigen test result<br><i>If Positive, fill/update the Adverse Event Form</i>       | Positive <input type="checkbox"/> | Negative <input type="checkbox"/> |
| <b>HIV PROPHYLAXIS</b>                                                                            |                                                                                                                         |                                   |                                   |
| <b>IF THE MOTHER TESTED POSITIVE FOR HIV</b>                                                      |                                                                                                                         |                                   |                                   |
| 15                                                                                                | Has the newborn been given an ARV drug for HIV prophylaxis?<br><i>If yes, please fill out the Medication Form</i>       | Yes <input type="checkbox"/>      | No <input type="checkbox"/>       |

| <b>COMMENTS (OPTIONAL)</b> |       |
|----------------------------|-------|
| 1                          | _____ |
| 2                          | _____ |
| 3                          | _____ |
| 4                          | _____ |
| 5                          | _____ |
| 6                          | _____ |
| 7                          | _____ |
| 8                          | _____ |

## **BIRTH**

### ***Newborn laboratory results***



**POST-PARTUM VISIT**  
***1 month after birth***  
***Newborn questionnaire***



| <b>NUTRITION</b>                          |                                                                                                                                                                                                                                                                                                                                                                                                                                                                                                                                                                                                                                                                                          |
|-------------------------------------------|------------------------------------------------------------------------------------------------------------------------------------------------------------------------------------------------------------------------------------------------------------------------------------------------------------------------------------------------------------------------------------------------------------------------------------------------------------------------------------------------------------------------------------------------------------------------------------------------------------------------------------------------------------------------------------------|
| 17                                        | <p>Is the woman breastfeeding the infant? Yes <input type="checkbox"/> No <input type="checkbox"/></p> <p>17.1 If yes, please specify when breastfeeding started</p> <p>Less than an hour after birth <input type="checkbox"/></p> <p>Between 1 and 12 hours after birth <input type="checkbox"/></p> <p>Between 12 and 24 hours after birth <input type="checkbox"/></p> <p>More than 24 hours after birth <input type="checkbox"/></p>                                                                                                                                                                                                                                                 |
| 18                                        | <p>During the first month of life, did the infant receive other foods or beverages apart from breast milk? Yes <input type="checkbox"/> No <input type="checkbox"/></p> <p>18.1 If yes, please specify which foods or beverages he/she received</p> <p>Water <input type="checkbox"/></p> <p>Juice <input type="checkbox"/></p> <p>Other type of milk <input type="checkbox"/></p> <p>Vegetables <input type="checkbox"/></p> <p>Fruit <input type="checkbox"/></p> <p>Sweets or sugar <input type="checkbox"/></p> <p>Traditional herbs <input type="checkbox"/></p> <p>Rice or cereals <input type="checkbox"/></p> <p>Other <input type="checkbox"/></p> <p>Please specify: _____</p> |
| 19                                        | <p>Yesterday, did the infant receive other foods or beverages apart from breast milk? Yes <input type="checkbox"/> No <input type="checkbox"/></p> <p>19.1 If yes, please specify which foods or beverages he/she received</p> <p>Water <input type="checkbox"/></p> <p>Juice <input type="checkbox"/></p> <p>Other type of milk <input type="checkbox"/></p> <p>Vegetables <input type="checkbox"/></p> <p>Fruit <input type="checkbox"/></p> <p>Sweets or sugar <input type="checkbox"/></p> <p>Traditional herbs <input type="checkbox"/></p> <p>Rice or cereals <input type="checkbox"/></p> <p>Other <input type="checkbox"/></p> <p>Please specify: _____</p>                      |
| <b>PSYCHOMOTOR DEVELOPMENT ASSESSMENT</b> |                                                                                                                                                                                                                                                                                                                                                                                                                                                                                                                                                                                                                                                                                          |
| 20                                        | Was the psychomotor development assessed? Yes <input type="checkbox"/> No <input type="checkbox"/>                                                                                                                                                                                                                                                                                                                                                                                                                                                                                                                                                                                       |
| 21                                        | <p>Gross motor skills</p> <p>21.1 Does the infant move the 4 extremities symmetrically? Yes <input type="checkbox"/> No <input type="checkbox"/></p> <p>21.2 Muscle tone</p> <p>Normal <input type="checkbox"/></p> <p>Abnormal <input type="checkbox"/></p>                                                                                                                                                                                                                                                                                                                                                                                                                             |
| 22                                        | <p>Fine motor skills</p> <p>Does the infant follow objects? Yes <input type="checkbox"/> No <input type="checkbox"/></p>                                                                                                                                                                                                                                                                                                                                                                                                                                                                                                                                                                 |
| 23                                        | <p>Language / audition</p> <p>Does the infant respond to sounds? Yes <input type="checkbox"/> No <input type="checkbox"/></p>                                                                                                                                                                                                                                                                                                                                                                                                                                                                                                                                                            |
| 24                                        | <p>Social skills</p> <p>Does the infant respond to smiles? Yes <input type="checkbox"/> No <input type="checkbox"/></p>                                                                                                                                                                                                                                                                                                                                                                                                                                                                                                                                                                  |

| <b>COMMENTS (OPTIONAL)</b> |       |
|----------------------------|-------|
| 1                          | _____ |
| 2                          | _____ |
| 3                          | _____ |
| 4                          | _____ |

**POST-PARTUM**  
***1 month after birth***  
***Newborn laboratory results***

|                                                                                           |                                                                               |  |
|-------------------------------------------------------------------------------------------|-------------------------------------------------------------------------------|--|
| <b>MA-CoV<br/>NCT03671109</b><br><br><b>Event:<br/>Laboratory<br/>results<br/>Newborn</b> | <b>ID</b> MACOC _ - _ _ _ _ _ _ <br><small>Site Code Subject N°</small>       |  |
|                                                                                           | <b>Participant's initials</b>  _ _   _ _ <br><small>1. 2. Family name</small> |  |
| <b>Date of the visit</b><br> _ _ - _ _ - _ _ _ _ _ _ <br><small>Day Month Year</small>    |                                                                               |  |

| <b>SARS-CoV-2 PCR LAB RESULTS (1 month after birth)</b> |                                                                                                                                                          |
|---------------------------------------------------------|----------------------------------------------------------------------------------------------------------------------------------------------------------|
| 1                                                       | Date of the sample  _ _ - _ _ - _ _ _ _ _ _ <br><small>Day Month Year</small>                                                                            |
| 2                                                       | SARS-CoV-2 PCR test result<br><i>If positive, fill/update the Adverse Event Form</i> Positive <input type="checkbox"/> Negative <input type="checkbox"/> |
| 3                                                       | Ct value  _ _                                                                                                                                            |
| 4                                                       | SARS-CoV-2 Viral load  _ _ _ _ _ _ _ _  copies/mL                                                                                                        |
| <b>HIV PCR LAB RESULTS – if a HIV PCR was done</b>      |                                                                                                                                                          |
| 5                                                       | Was an HIV PCR done? Yes <input type="checkbox"/> No <input type="checkbox"/>                                                                            |
| 5.1                                                     | <i>If yes,</i><br>Date of the sample  _ _ - _ _ - _ _ _ _ _ _                                                                                            |
| 5.2                                                     | HIV PCR test result<br><i>If positive, fill/update the Adverse Event Form</i> Positive <input type="checkbox"/> Negative <input type="checkbox"/>        |

| <b>COMMENTS (OPTIONAL)</b> |       |
|----------------------------|-------|
| 1                          | _____ |
| 2                          | _____ |
| 3                          | _____ |
| 4                          | _____ |
| 5                          | _____ |
| 6                          | _____ |
| 7                          | _____ |
| 8                          | _____ |



## STUDY COMPLETION FORM

|                                                                                        |                                                                                    |  |
|----------------------------------------------------------------------------------------|------------------------------------------------------------------------------------|--|
| <b>STUDY COMPLETION FORM MA-CoV</b><br><br><b>Event: Study completion form Newborn</b> | <b>ID</b> MACOC _ - _ _ _ _ _ _ <br><small>Site Code Subject N<sup>o</sup></small> |  |
|                                                                                        | <b>Participant's initials</b>  _ _   _ _ <br><small>1. 2. Family name</small>      |  |
| <b>Date of the visit</b><br> _ _ - _ _ - _ _ _ _ _ _ <br><small>Day Month Year</small> |                                                                                    |  |

| STUDY COMPLETION                                                                                                                                            |                                                                                                                                                                                                                                                                                                                                                                                                                                                                                                  |
|-------------------------------------------------------------------------------------------------------------------------------------------------------------|--------------------------------------------------------------------------------------------------------------------------------------------------------------------------------------------------------------------------------------------------------------------------------------------------------------------------------------------------------------------------------------------------------------------------------------------------------------------------------------------------|
| 1                                                                                                                                                           | Date of last contact?  _ _ - _ _ - _ _ _ _ _ _ <br><small>Day Month Year</small>                                                                                                                                                                                                                                                                                                                                                                                                                 |
| 2                                                                                                                                                           | Did the newborn complete the study? Yes <input type="checkbox"/> No <input type="checkbox"/><br><br>2.1 If the answer is no, please provide all relevant information related to reason for premature discontinuation<br>Death <input type="checkbox"/><br>Serious health outcome <input type="checkbox"/><br>Consent withdrawal <input type="checkbox"/><br>Migration <input type="checkbox"/><br>Lost to follow up <input type="checkbox"/><br>Other <input type="checkbox"/><br>Specify: _____ |
| 3                                                                                                                                                           | Date of participant's study completion  _ _ - _ _ - _ _ _ _ _ _ <br><small>Day Month Year</small>                                                                                                                                                                                                                                                                                                                                                                                                |
| 4                                                                                                                                                           | I have reviewed and found all data pertaining to this participant to be complete and accurate<br><br>Printed Investigator's name _____<br><small>_____</small><br><small>Day Month Year</small>                                                                                                                                                                                                                                                                                                  |
| <b>Please provide all relevant information related to reason for premature study discontinuation including contributory factors in the comments section</b> |                                                                                                                                                                                                                                                                                                                                                                                                                                                                                                  |

| COMMENTS (OPTIONAL) |       |
|---------------------|-------|
| 1                   | _____ |
| 2                   | _____ |
| 3                   | _____ |
| 4                   | _____ |
| 5                   | _____ |
| 6                   | _____ |
| 7                   | _____ |
| 8                   | _____ |
| 9                   | _____ |
| 10                  | _____ |

## ADVERSE EVENTS FORM

|               |                                                                                                                                              |                                                                                                             |  |
|---------------|----------------------------------------------------------------------------------------------------------------------------------------------|-------------------------------------------------------------------------------------------------------------|--|
| <b>MA-CoV</b> | <b>ID</b> MACOC <input type="text"/> - <input type="text"/> <input type="text"/> <input type="text"/><br><small>Site Code Subject N°</small> | <b>Participant's initials</b> <input type="text"/> <input type="text"/><br><small>1. 2. Family name</small> |  |
|---------------|----------------------------------------------------------------------------------------------------------------------------------------------|-------------------------------------------------------------------------------------------------------------|--|

**Severity:** 1 Mild (Grade 1): Awareness of sign or symptom easily tolerated, 2 Moderate (Grade 2): Discomfort enough to cause interference with usual activity, 3 Severe (Grade 3): Incapacitating with inability to work or perform usual activity, 4 Life-threatening (Grade 4): Patient at risk of death at the time of the event, or Event Results in death, or Requires hospitalization or prolongation of existing hospitalization, or Results in persistent or significant disability or incapacity or Consists of a congenital anomaly or birth defect

**Outcome:** 1-Completely recovered, 2-Not yet completely recovered, 3-Deterioration, 4-Permanent damage, 5-Death, 6-Ongoing, 7-Unknown

**Action Taken:** 1-No action taken, 2-Concomitant medication given, 3-Non-drug therapy given, 4-Hospitalization/Hospitalization prolonged

| ADVERSE EVENT # |                                                                                                                                |                                                                                                                                                                                                            |
|-----------------|--------------------------------------------------------------------------------------------------------------------------------|------------------------------------------------------------------------------------------------------------------------------------------------------------------------------------------------------------|
| 1               | A. Name / Description<br><input type="text"/>                                                                                  | B. Start date<br><input type="text"/> / <input type="text"/> / <input type="text"/><br><small>Day Month Year</small>                                                                                       |
|                 | C. End date<br><input type="text"/> / <input type="text"/><br><small>Month Year</small>                                        | <input type="checkbox"/> Ongoing                                                                                                                                                                           |
| 2               | A. Severity<br><input type="checkbox"/> 1 <input type="checkbox"/> 2 <input type="checkbox"/> 3 <input type="checkbox"/> 4     | B. Outcome<br><input type="checkbox"/> 1 <input type="checkbox"/> 2 <input type="checkbox"/> 3 <input type="checkbox"/> 4 <input type="checkbox"/> 5 <input type="checkbox"/> 6 <input type="checkbox"/> 7 |
|                 | C. Action taken<br><input type="checkbox"/> 1 <input type="checkbox"/> 2 <input type="checkbox"/> 3 <input type="checkbox"/> 4 |                                                                                                                                                                                                            |
| 3               | Is this AE Serious? <input type="checkbox"/> NO <input type="checkbox"/> YES                                                   |                                                                                                                                                                                                            |
| ADVERSE EVENT # |                                                                                                                                |                                                                                                                                                                                                            |
| 1               | A. Name / Description<br><input type="text"/>                                                                                  | B. Start date<br><input type="text"/> / <input type="text"/> / <input type="text"/><br><small>Day Month Year</small>                                                                                       |
|                 | C. End date<br><input type="text"/> / <input type="text"/><br><small>Month Year</small>                                        | <input type="checkbox"/> Ongoing                                                                                                                                                                           |
| 2               | A. Severity<br><input type="checkbox"/> 1 <input type="checkbox"/> 2 <input type="checkbox"/> 3 <input type="checkbox"/> 4     | B. Outcome<br><input type="checkbox"/> 1 <input type="checkbox"/> 2 <input type="checkbox"/> 3 <input type="checkbox"/> 4 <input type="checkbox"/> 5 <input type="checkbox"/> 6 <input type="checkbox"/> 7 |
|                 | C. Action taken<br><input type="checkbox"/> 1 <input type="checkbox"/> 2 <input type="checkbox"/> 3 <input type="checkbox"/> 4 |                                                                                                                                                                                                            |
| 3               | Is this AE Serious? <input type="checkbox"/> NO <input type="checkbox"/> YES                                                   |                                                                                                                                                                                                            |
| ADVERSE EVENT # |                                                                                                                                |                                                                                                                                                                                                            |
| 1               | A. Name / Description<br><input type="text"/>                                                                                  | B. Start date<br><input type="text"/> / <input type="text"/> / <input type="text"/><br><small>Day Month Year</small>                                                                                       |
|                 | C. End date<br><input type="text"/> / <input type="text"/><br><small>Month Year</small>                                        | <input type="checkbox"/> Ongoing                                                                                                                                                                           |
| 2               | A. Severity<br><input type="checkbox"/> 1 <input type="checkbox"/> 2 <input type="checkbox"/> 3 <input type="checkbox"/> 4     | B. Outcome<br><input type="checkbox"/> 1 <input type="checkbox"/> 2 <input type="checkbox"/> 3 <input type="checkbox"/> 4 <input type="checkbox"/> 5 <input type="checkbox"/> 6 <input type="checkbox"/> 7 |
|                 | C. Action taken<br><input type="checkbox"/> 1 <input type="checkbox"/> 2 <input type="checkbox"/> 3 <input type="checkbox"/> 4 |                                                                                                                                                                                                            |
| 3               | Is this AE Serious? <input type="checkbox"/> NO <input type="checkbox"/> YES                                                   |                                                                                                                                                                                                            |

## **MEDICATION FORMS**







## **BIRTH**

### ***Newborn visit***



|                                                                                                   |                                                                                                                         |                                   |                                   |
|---------------------------------------------------------------------------------------------------|-------------------------------------------------------------------------------------------------------------------------|-----------------------------------|-----------------------------------|
| 9                                                                                                 | Does the child need admission to the hospital for any problem?<br><i>If the answer is yes please fill in an AE form</i> | Yes <input type="checkbox"/>      | No <input type="checkbox"/>       |
| 10                                                                                                | 10.1. Neuromuscular maturity                                                                                            | 10.1.1 Posture score              | <input type="text"/>              |
|                                                                                                   |                                                                                                                         | 10.1.2 Square window              | <input type="text"/>              |
|                                                                                                   |                                                                                                                         | 10.1.3 Arm recoil                 | <input type="text"/>              |
|                                                                                                   |                                                                                                                         | 10.1.4 Popliteal angle            | <input type="text"/>              |
|                                                                                                   |                                                                                                                         | 10.1.5 Scarf sign                 | <input type="text"/>              |
|                                                                                                   |                                                                                                                         | 10.1.6 Heel to ear                | <input type="text"/>              |
|                                                                                                   | Ballard test:                                                                                                           |                                   |                                   |
|                                                                                                   | 10.2. Physical maturity                                                                                                 | 10.2.1 Skin                       | <input type="text"/>              |
|                                                                                                   |                                                                                                                         | 10.2.2 Lanugo                     | <input type="text"/>              |
|                                                                                                   |                                                                                                                         | 10.2.3 Plantar surfasse           | <input type="text"/>              |
|                                                                                                   | 10.2.4 Breast                                                                                                           | <input type="text"/>              |                                   |
|                                                                                                   | 10.2.5 Eye-Ear                                                                                                          | <input type="text"/>              |                                   |
|                                                                                                   | 10.2.6 Geniyals                                                                                                         | <input type="text"/>              |                                   |
| <b>THROAT SWAB</b>                                                                                |                                                                                                                         |                                   |                                   |
| <b>IF THE MOTHER'S PCR HAS BEEN POSITIVE AT PREGNANCY, PLEASE FILL IN THE FOLLOWING QUESTIONS</b> |                                                                                                                         |                                   |                                   |
| 11                                                                                                | Was a throab swab for COVID-19 collected from the newborn?                                                              | Yes <input type="checkbox"/>      | No <input type="checkbox"/>       |
| 12                                                                                                | IF yes, indicate the SARS-CoV-2 PCR result<br><i>If positive, fill/update the Adverse Event Form</i>                    | Positive <input type="checkbox"/> | Negative <input type="checkbox"/> |
| 13                                                                                                | Was a rapid antigen test for COVID-19 performed?                                                                        | Yes <input type="checkbox"/>      | No <input type="checkbox"/>       |
| 14                                                                                                | IF yes, indicate the COVID-19 rapid antigen test result<br><i>If Positive, fill/update the Adverse Event Form</i>       | Positive <input type="checkbox"/> | Negative <input type="checkbox"/> |
| <b>HIV PROPHYLAXIS</b>                                                                            |                                                                                                                         |                                   |                                   |
| <b>IF THE MOTHER TESTED POSITIVE FOR HIV</b>                                                      |                                                                                                                         |                                   |                                   |
| 15                                                                                                | Has the newborn been given an ARV drug for HIV prophylaxis?<br><i>If yes, please fill out the Medication Form</i>       | Yes <input type="checkbox"/>      | No <input type="checkbox"/>       |

| <b>COMMENTS (OPTIONAL)</b> |       |
|----------------------------|-------|
| 1                          | _____ |
| 2                          | _____ |
| 3                          | _____ |
| 4                          | _____ |
| 5                          | _____ |
| 6                          | _____ |
| 7                          | _____ |
| 8                          | _____ |

## **BIRTH**

### ***Newborn laboratory results***



**POST-PARTUM VISIT**  
***1 month after birth***  
***Newborn questionnaire***



| <b>NUTRITION</b>                          |                                                                                                                                                                                                                                                                                                                                                                                                                                                                                                                                                                                                                                                                                          |
|-------------------------------------------|------------------------------------------------------------------------------------------------------------------------------------------------------------------------------------------------------------------------------------------------------------------------------------------------------------------------------------------------------------------------------------------------------------------------------------------------------------------------------------------------------------------------------------------------------------------------------------------------------------------------------------------------------------------------------------------|
| 17                                        | <p>Is the woman breastfeeding the infant? Yes <input type="checkbox"/> No <input type="checkbox"/></p> <p>17.1 If yes, please specify when breastfeeding started</p> <p>Less than an hour after birth <input type="checkbox"/></p> <p>Between 1 and 12 hours after birth <input type="checkbox"/></p> <p>Between 12 and 24 hours after birth <input type="checkbox"/></p> <p>More than 24 hours after birth <input type="checkbox"/></p>                                                                                                                                                                                                                                                 |
| 18                                        | <p>During the first month of life, did the infant receive other foods or beverages apart from breast milk? Yes <input type="checkbox"/> No <input type="checkbox"/></p> <p>18.1 If yes, please specify which foods or beverages he/she received</p> <p>Water <input type="checkbox"/></p> <p>Juice <input type="checkbox"/></p> <p>Other type of milk <input type="checkbox"/></p> <p>Vegetables <input type="checkbox"/></p> <p>Fruit <input type="checkbox"/></p> <p>Sweets or sugar <input type="checkbox"/></p> <p>Traditional herbs <input type="checkbox"/></p> <p>Rice or cereals <input type="checkbox"/></p> <p>Other <input type="checkbox"/></p> <p>Please specify: _____</p> |
| 19                                        | <p>Yesterday, did the infant receive other foods or beverages apart from breast milk? Yes <input type="checkbox"/> No <input type="checkbox"/></p> <p>19.1 If yes, please specify which foods or beverages he/she received</p> <p>Water <input type="checkbox"/></p> <p>Juice <input type="checkbox"/></p> <p>Other type of milk <input type="checkbox"/></p> <p>Vegetables <input type="checkbox"/></p> <p>Fruit <input type="checkbox"/></p> <p>Sweets or sugar <input type="checkbox"/></p> <p>Traditional herbs <input type="checkbox"/></p> <p>Rice or cereals <input type="checkbox"/></p> <p>Other <input type="checkbox"/></p> <p>Please specify: _____</p>                      |
| <b>PSYCHOMOTOR DEVELOPMENT ASSESSMENT</b> |                                                                                                                                                                                                                                                                                                                                                                                                                                                                                                                                                                                                                                                                                          |
| 20                                        | Was the psychomotor development assessed? Yes <input type="checkbox"/> No <input type="checkbox"/>                                                                                                                                                                                                                                                                                                                                                                                                                                                                                                                                                                                       |
| 21                                        | <p>Gross motor skills</p> <p>21.1 Does the infant move the 4 extremities symmetrically? Yes <input type="checkbox"/> No <input type="checkbox"/></p> <p>21.2 Muscle tone</p> <p>Normal <input type="checkbox"/></p> <p>Abnormal <input type="checkbox"/></p>                                                                                                                                                                                                                                                                                                                                                                                                                             |
| 22                                        | <p>Fine motor skills</p> <p>Does the infant follow objects? Yes <input type="checkbox"/> No <input type="checkbox"/></p>                                                                                                                                                                                                                                                                                                                                                                                                                                                                                                                                                                 |
| 23                                        | <p>Language / audition</p> <p>Does the infant respond to sounds? Yes <input type="checkbox"/> No <input type="checkbox"/></p>                                                                                                                                                                                                                                                                                                                                                                                                                                                                                                                                                            |
| 24                                        | <p>Social skills</p> <p>Does the infant respond to smiles? Yes <input type="checkbox"/> No <input type="checkbox"/></p>                                                                                                                                                                                                                                                                                                                                                                                                                                                                                                                                                                  |

| <b>COMMENTS (OPTIONAL)</b> |       |
|----------------------------|-------|
| 1                          | _____ |
| 2                          | _____ |
| 3                          | _____ |
| 4                          | _____ |



**POST-PARTUM**

***1 month after birth***

***Newborn laboratory results***



## **STUDY COMPLETION FORM**

|                                                                                            |                                                                               |  |
|--------------------------------------------------------------------------------------------|-------------------------------------------------------------------------------|--|
| <b>STUDY COMPLETION FORM MA-CoV</b><br><br><b>Event: Study completion form Newborn</b>     | <b>ID</b> MACOC _ - _ _ _ _ _ _ _ _ <br><small>Site Code Subject N°</small>   |  |
|                                                                                            | <b>Participant's initials</b>  _ _   _ _ <br><small>1. 2. Family name</small> |  |
| <b>Date of the visit</b><br> _ _ - _ _ - _ _ _ _ _ _ _ _ <br><small>Day Month Year</small> |                                                                               |  |

| STUDY COMPLETION                                                                                                                                            |                                                                                                                                                                                                                                                                                                                                                                                                                                                                                                  |
|-------------------------------------------------------------------------------------------------------------------------------------------------------------|--------------------------------------------------------------------------------------------------------------------------------------------------------------------------------------------------------------------------------------------------------------------------------------------------------------------------------------------------------------------------------------------------------------------------------------------------------------------------------------------------|
| 1                                                                                                                                                           | Date of last contact?  _ _ - _ _ - _ _ _ _ _ _ _ _ <br><small>Day Month Year</small>                                                                                                                                                                                                                                                                                                                                                                                                             |
| 2                                                                                                                                                           | Did the newborn complete the study? Yes <input type="checkbox"/> No <input type="checkbox"/><br><br>2.1 If the answer is no, please provide all relevant information related to reason for premature discontinuation<br>Death <input type="checkbox"/><br>Serious health outcome <input type="checkbox"/><br>Consent withdrawal <input type="checkbox"/><br>Migration <input type="checkbox"/><br>Lost to follow up <input type="checkbox"/><br>Other <input type="checkbox"/><br>Specify: _____ |
| 3                                                                                                                                                           | Date of participant's study completion  _ _ - _ _ - _ _ _ _ _ _ _ _ <br><small>Day Month Year</small>                                                                                                                                                                                                                                                                                                                                                                                            |
| 4                                                                                                                                                           | I have reviewed and found all data pertaining to this participant to be complete and accurate<br><br>Printed Investigator's name _____<br><small>Day Month Year</small>                                                                                                                                                                                                                                                                                                                          |
| <b>Please provide all relevant information related to reason for premature study discontinuation including contributory factors in the comments section</b> |                                                                                                                                                                                                                                                                                                                                                                                                                                                                                                  |

| COMMENTS (OPTIONAL) |       |
|---------------------|-------|
| 1                   | _____ |
| 2                   | _____ |
| 3                   | _____ |
| 4                   | _____ |
| 5                   | _____ |
| 6                   | _____ |
| 7                   | _____ |
| 8                   | _____ |
| 9                   | _____ |
| 10                  | _____ |

## ADVERSE EVENTS FORM

|               |                                                                                                                                              |                                                                                                                                                       |  |
|---------------|----------------------------------------------------------------------------------------------------------------------------------------------|-------------------------------------------------------------------------------------------------------------------------------------------------------|--|
| <b>MA-CoV</b> | <b>ID</b> MACOC <input type="text"/> - <input type="text"/> <input type="text"/> <input type="text"/><br><small>Site Code Subject N°</small> | <b>Participant's initials</b> <input type="text"/> <input type="text"/> <input type="text"/> <input type="text"/><br><small>1. 2. Family name</small> |  |
|---------------|----------------------------------------------------------------------------------------------------------------------------------------------|-------------------------------------------------------------------------------------------------------------------------------------------------------|--|

**Severity:** 1 Mild (Grade 1): Awareness of sign or symptom easily tolerated, 2 Moderate (Grade 2): Discomfort enough to cause interference with usual activity, 3 Severe (Grade 3): Incapacitating with inability to work or perform usual activity, 4 Life-threatening (Grade 4): Patient at risk of death at the time of the event, or Event Results in death, or Requires hospitalization or prolongation of existing hospitalization, or Results in persistent or significant disability or incapacity or Consists of a congenital anomaly or birth defect

**Outcome:** 1-Completely recovered, 2-Not yet completely recovered, 3-Deterioration, 4-Permanent damage, 5-Death, 6-Ongoing, 7-Unknown

**Action Taken:** 1-No action taken, 2-Concomitant medication given, 3-Non-drug therapy given, 4-Hospitalization/Hospitalization prolonged

| ADVERSE EVENT # |                                                                                                                                   |                                                                                                                                                                                                                   |                                                                                                                                                                                                                   |
|-----------------|-----------------------------------------------------------------------------------------------------------------------------------|-------------------------------------------------------------------------------------------------------------------------------------------------------------------------------------------------------------------|-------------------------------------------------------------------------------------------------------------------------------------------------------------------------------------------------------------------|
| 1               | <b>A. Name / Description</b><br><input type="text"/>                                                                              | <b>B. Start date</b><br><input type="text"/> <input type="text"/> <input type="text"/> <input type="text"/> <input type="text"/> <input type="text"/><br><small>Day Month Year</small>                            | <b>C. End date</b><br><input type="text"/> <input type="text"/> <input type="text"/> <input type="text"/> <input type="text"/> <input type="text"/><br><small>Month Year</small> <input type="checkbox"/> Ongoing |
| 2               | <b>A. Severity</b><br><input type="checkbox"/> 1 <input type="checkbox"/> 2 <input type="checkbox"/> 3 <input type="checkbox"/> 4 | <b>B. Outcome</b><br><input type="checkbox"/> 1 <input type="checkbox"/> 2 <input type="checkbox"/> 3 <input type="checkbox"/> 4 <input type="checkbox"/> 5 <input type="checkbox"/> 6 <input type="checkbox"/> 7 | <b>C. Action taken</b><br><input type="checkbox"/> 1 <input type="checkbox"/> 2 <input type="checkbox"/> 3 <input type="checkbox"/> 4                                                                             |
| 3               | Is this AE Serious? <input type="checkbox"/> NO <input type="checkbox"/> YES                                                      |                                                                                                                                                                                                                   |                                                                                                                                                                                                                   |

| ADVERSE EVENT # |                                                                                                                                   |                                                                                                                                                                                                                   |                                                                                                                                                                                                                   |
|-----------------|-----------------------------------------------------------------------------------------------------------------------------------|-------------------------------------------------------------------------------------------------------------------------------------------------------------------------------------------------------------------|-------------------------------------------------------------------------------------------------------------------------------------------------------------------------------------------------------------------|
| 1               | <b>A. Name / Description</b><br><input type="text"/>                                                                              | <b>B. Start date</b><br><input type="text"/> <input type="text"/> <input type="text"/> <input type="text"/> <input type="text"/> <input type="text"/><br><small>Day Month Year</small>                            | <b>C. End date</b><br><input type="text"/> <input type="text"/> <input type="text"/> <input type="text"/> <input type="text"/> <input type="text"/><br><small>Month Year</small> <input type="checkbox"/> Ongoing |
| 2               | <b>A. Severity</b><br><input type="checkbox"/> 1 <input type="checkbox"/> 2 <input type="checkbox"/> 3 <input type="checkbox"/> 4 | <b>B. Outcome</b><br><input type="checkbox"/> 1 <input type="checkbox"/> 2 <input type="checkbox"/> 3 <input type="checkbox"/> 4 <input type="checkbox"/> 5 <input type="checkbox"/> 6 <input type="checkbox"/> 7 | <b>C. Action taken</b><br><input type="checkbox"/> 1 <input type="checkbox"/> 2 <input type="checkbox"/> 3 <input type="checkbox"/> 4                                                                             |
| 3               | Is this AE Serious? <input type="checkbox"/> NO <input type="checkbox"/> YES                                                      |                                                                                                                                                                                                                   |                                                                                                                                                                                                                   |

| ADVERSE EVENT # |                                                                                                                                   |                                                                                                                                                                                                                   |                                                                                                                                                                                                                   |
|-----------------|-----------------------------------------------------------------------------------------------------------------------------------|-------------------------------------------------------------------------------------------------------------------------------------------------------------------------------------------------------------------|-------------------------------------------------------------------------------------------------------------------------------------------------------------------------------------------------------------------|
| 1               | <b>A. Name / Description</b><br><input type="text"/>                                                                              | <b>B. Start date</b><br><input type="text"/> <input type="text"/> <input type="text"/> <input type="text"/> <input type="text"/> <input type="text"/><br><small>Day Month Year</small>                            | <b>C. End date</b><br><input type="text"/> <input type="text"/> <input type="text"/> <input type="text"/> <input type="text"/> <input type="text"/><br><small>Month Year</small> <input type="checkbox"/> Ongoing |
| 2               | <b>A. Severity</b><br><input type="checkbox"/> 1 <input type="checkbox"/> 2 <input type="checkbox"/> 3 <input type="checkbox"/> 4 | <b>B. Outcome</b><br><input type="checkbox"/> 1 <input type="checkbox"/> 2 <input type="checkbox"/> 3 <input type="checkbox"/> 4 <input type="checkbox"/> 5 <input type="checkbox"/> 6 <input type="checkbox"/> 7 | <b>C. Action taken</b><br><input type="checkbox"/> 1 <input type="checkbox"/> 2 <input type="checkbox"/> 3 <input type="checkbox"/> 4                                                                             |
| 3               | Is this AE Serious? <input type="checkbox"/> NO <input type="checkbox"/> YES                                                      |                                                                                                                                                                                                                   |                                                                                                                                                                                                                   |

## **MEDICATION FORMS**
